# Supplementary material
Source: PubMed Central journal article supplement (PMC1759988)
Supplement: i1466-1268-11-4-356-s1.pdf [file i1466-1268-11-4-356-s1.pdf]

**Supplemental Table 1** Oligonucleotide probes used for analysis of mouse gene expression by bDNA signal amplification assay

| Gene    | Accession no. | Target region           | Function | Sequence                                        |
|---------|---------------|-------------------------|----------|-------------------------------------------------|
| GSTA1   | NM_008181     | 177—200                 | CE       | cccgagtttcagaaatcttTTTTctctggaaagaaagt          |
|         |               | 285—308                 | CE       | tgtagtggagaatggcttggctTTTTctctggaaagaaagt       |
|         |               | 333—354                 | CE       | gctctcctcatgtcctccTTTTctctggaaagaaagt           |
|         |               | 424—443                 | CE       | ttgctcttctcctcaggTTTTctctggaaagaaagt            |
|         |               | 119—137                 | LE       | gctccattctcccctgccccTTTTtaggcataggaccgtgtct     |
|         |               | 138—156                 | LE       | gccaagagccaccggatagTTTTtaggcataggaccgtgtct      |
|         |               | 157—176                 | LE       | caaaactccacaccagctgcaTTTTtaggcataggaccgtgtct    |
|         |               | 201—221                 | LE       | ttcgtaacctgccaggctcatTTTTtaggcataggaccgtgtct    |
|         |               | 265—284                 | LE       | gcaccaggttcatcccctgTTTTtaggcataggaccgtgtct      |
|         |               | 355—379                 | LE       | tcctctgtgacatgcaatgatTTTTtaggcataggaccgtgtct    |
|         |               | 380—400                 | LE       | cattatcccagatccgccacTTTTtaggcataggaccgtgtct     |
|         |               | 486—507                 | LE       | ttcaacacctttcaaggcagTTTTtaggcataggaccgtgtct     |
|         |               | 531—549                 | LE       | ctgctcagcctgtgccaTTTTtaggcataggaccgtgtct        |
|         |               | 550—569                 | LE       | caaccagggaataatcagccTTTTtaggcataggaccgtgtct     |
|         |               | 222—243                 | BL       | tggaacatcagactcccatcac                          |
|         |               | 244—264                 | BL       | atctctaccatgggcactg                             |
|         |               | 309—332                 | BL       | catagagggtgattggaggcaa                          |
|         |               | 401—423                 | BL       | ggcatgtggggtaataagagaat                         |
|         |               | 444—463                 | BL       | ttcctgatctggcaaggc                              |
|         |               | 464—485                 | BL       | ggaagtaacggctcctggttg                           |
| 508—530 | BL            | cgagataatctgtccatggctc  |          |                                                 |
| GSTA4   | NM_010357     | 612—634                 | CE       | atctgtcttaaatgcctgcagTTTTctctggaaagaaagt        |
|         |               | 807—831                 | CE       | tctatatacctgtctctggaatcTTTTctctggaaagaaagt      |
|         |               | 832—852                 | CE       | tgaagagctgtactcctgggaTTTTctctggaaagaaagt        |
|         |               | 481—504                 | LE       | ctccgtggtctttaaactcttTTTTtaggcataggaccgtgtct    |
|         |               | 525—545                 | LE       | gatgtctgcccaactgagctgTTTTtaggcataggaccgtgtct    |
|         |               | 546—567                 | LE       | tcaaaatggctcttaggagctgTTTTtaggcataggaccgtgtct   |
|         |               | 568—588                 | LE       | gggcaactgagttctccaccaTTTTtaggcataggaccgtgtct    |
|         |               | 661—679                 | LE       | tgactccgggtgcaggaTTTTtaggcataggaccgtgtct        |
|         |               | 680—700                 | LE       | ccatctggaggagctctcTTTTtaggcataggaccgtgtct       |
|         |               | 722—746                 | LE       | gctgcactagaactcaggacaatcTTTTtaggcataggaccgtgtct |
|         |               | 747—766                 | LE       | tgggtgccacctaagcacTTTTtaggcataggaccgtgtct       |
|         |               | 789—806                 | LE       | tctgcagctggcctgtggTTTTtaggcataggaccgtgtct       |
|         |               | 432—459                 | BL       | tttagctctgacagatcaaatcata                       |
|         |               | 460—480                 | BL       | caaacactgggaagtaacggg                           |
|         |               | 505—524                 | BL       | gttgccaacgagaaaagcct                            |
|         |               | 589—611                 | BL       | cagagggaagtcggacagtacag                         |
|         |               | 635—660                 | BL       | acttctaattgtaggaatgtgctg                        |
| 701—721 | BL            | ctgaccacctcaacatagggg   |          |                                                 |
| 767—788 | BL            | tgacactgcaatggaacctg    |          |                                                 |
| GSTM1   | NM_010358     | 345—364                 | CE       | aactggctcagcaggactgacTTTTctctggaaagaaagt        |
|         |               | 467—488                 | CE       | tccaggcccagctgaaactTTTTctctggaaagaaagt          |
|         |               | 729—747                 | CE       | tgtctgcacggatcctctcTTTTctctggaaagaaagt          |
|         |               | 765—786                 | CE       | tgagctgatcgggtgtTTTTctctggaaagaaagt             |
|         |               | 324—344                 | LE       | ggacaaaacagcgggtcccTTTTtaggcataggaccgtgtct      |
|         |               | 411—429                 | LE       | gctgggtgtggtcttcaTTTTtaggcataggaccgtgtct        |
|         |               | 430—446                 | LE       | gtatcccagatcatagggatgTTTTtaggcataggaccgtgtct    |
|         |               | 447—466                 | LE       | catgaggatcgggtgtgTTTTtaggcataggaccgtgtct        |
|         |               | 489—511                 | LE       | gcttgagtctgtattccaggagTTTTtaggcataggaccgtgtct   |
|         |               | 512—529                 | LE       | tctcattcagccactggctcTTTTtaggcataggaccgtgtct     |
|         |               | 530—552                 | LE       | cgcaggatggcattgctctgTTTTtaggcataggaccgtgtct     |
|         |               | 598—623                 | LE       | ggctcttcgggcaaggatTTTTtaggcataggaccgtgtct       |
|         |               | 685—709                 | LE       | ccatgacctggttccacaaTTTTtaggcataggaccgtgtct      |
|         |               | 365—387                 | LE       | gtcagggtgtaacagagcatgaTTTTtaggcataggaccgtgtct   |
|         |               | 388—410                 | LE       | aactctggctctgcttctcaaaTTTTtaggcataggaccgtgtct   |
|         |               | 553—574                 | BL       | cagactactagagaaactgtgggca                       |
|         |               | 575—597                 | BL       | tgtgtgttgaggtgactttata                          |
| 624—640 | BL            | agtccgaggagctcca        |          |                                                 |
| 641—660 | BL            | ccatggtgatctctctcatcata |          |                                                 |
| 661—684 | BL            | tgtcaagtcgggagcgtca     |          |                                                 |
| 710—728 | BL            | caagtaaggcagattgggaag   |          |                                                 |
| 748—764 | BL            | ggtgatctgtgtatccatgat   |          |                                                 |

Supplemental Table 1 Continued

| Gene    | Accession no. | Target region             | Function  | Sequence                                         |    |                                           |
|---------|---------------|---------------------------|-----------|--------------------------------------------------|----|-------------------------------------------|
| GSTM2   | NM_008183     | 674—695                   | CE        | caaagattggctggagaggaaTTTTTctcttgaaagaaagt        |    |                                           |
|         |               | 763—783                   | CE        | taagagctaggccagcagagTTTTTctcttgaaagaaagt         |    |                                           |
|         |               | 784—804                   | CE        | ggagaagaaagctgcacgtggTTTTTctcttgaaagaaagt        |    |                                           |
|         |               | 847—865                   | CE        | accagaggctggctgagTTTTTctcttgaaagaaagt            |    |                                           |
|         |               | 629—651                   | LE        | gatatcttctcaggccctcaaaTTTTTAggcataggaccctgtct    |    |                                           |
|         |               | 717—740                   | LE        | tctggccttgatcctactttgTTTTTAggcataggaccctgtct     |    |                                           |
|         |               | 741—762                   | LE        | cactcatgagtattccccaggTTTTTAggcataggaccctgtct     |    |                                           |
|         |               | 887—911                   | LE        | agacaagggataggaggactaatTTTTTAggcataggaccctgtct   |    |                                           |
|         |               | 950—973                   | LE        | ggattctcgggtctagtacattccTTTTTAggcataggaccctgtct  |    |                                           |
|         |               | 990—1013                  | LE        | ggcagcacacagacagatctaacTTTTTAggcataggaccctgtct   |    |                                           |
|         |               | 652—673                   | BL        | gcggctgctctcatgtagtca                            |    |                                           |
|         |               | 696—716                   | BL        | ggttcaaaaaggccatcttg                             |    |                                           |
|         |               | 805—826                   | BL        | atggaggaaatagggaatggaa                           |    |                                           |
|         |               | 827—846                   | BL        | ggaagggctgggaagaggaa                             |    |                                           |
|         |               | 866—886                   | BL        | gaagaatggagagccaagg                              |    |                                           |
|         |               | 912—928                   | BL        | ggctggatgcagggcag                                |    |                                           |
|         |               | 929—949                   | BL        | tccaacctcactgagggaag                             |    |                                           |
|         |               | 974—989                   | BL        | tctcaggccaggccgg                                 |    |                                           |
|         |               | GSTM3                     | NM_010359 | 335—355                                          | CE | tcatgagctgtatcgggtgtTTTTTctcttgaaagaaagt  |
|         |               |                           |           | 356—376                                          | CE | aatcgggactgcagcagactaTTTTTctcttgaaagaaagt |
| 378—400 | CE            |                           |           | agaactctggctctgctctcaTTTTTctcttgaaagaaagt        |    |                                           |
| 401—420 | CE            |                           |           | tttctcagggatggccttcaTTTTTctcttgaaagaaagt         |    |                                           |
| 141—159 | LE            |                           |           | cagccactggctcggctcaTTTTTAggcataggaccctgtct       |    |                                           |
| 160—182 | LE            |                           |           | aggccaagattgaattctcactTTTTTAggcataggaccctgtct    |    |                                           |
| 229—247 | LE            |                           |           | ggatggcattgctctgggtTTTTTAggcataggaccctgtct       |    |                                           |
| 266—288 | LE            |                           |           | tgtctctccacacagggtgtgtctTTTTTAggcataggaccctgtct  |    |                                           |
| 289—309 | LE            |                           |           | cacacggatcctctcctctcTTTTTAggcataggaccctgtct      |    |                                           |
| 421—445 | LE            |                           |           | ccaggaactcagagtagagcttcatTTTTTAggcataggaccctgtct |    |                                           |
| 512—534 | LE            |                           |           | gggctcaaacatacgatactggTTTTTAggcataggaccctgtct    |    |                                           |
| 183—202 | BL            |                           |           | agggcagattgggaaaatcc                             |    |                                           |
| 203—226 | BL            |                           |           | ccttgtgtgacctcaattaagt                           |    |                                           |
| 249—264 | BL            |                           |           | ccggccaaggtagcgc                                 |    |                                           |
| 310—334 | BL            |                           |           | ccataactggttctccaagtac                           |    |                                           |
| 446—464 | BL            |                           |           | gcaaacctggcctcttgc                               |    |                                           |
| 465—486 | BL            |                           |           | cacataggtgacctgtcccct                            |    |                                           |
| 487—511 | BL            | caagaatgtcataagcaaggaaatc |           |                                                  |    |                                           |
